# Supplementary material for: Spatial Distribution of Public Housing and Urban Socio-Spatial Inequalities: An Exploratory Analysis of the Valencia Case
Source: MDPI journal article supplement (doi:10.3390/su132011381), 2021-10-15
Supplement: s1 [file s1]

## Supplementary material

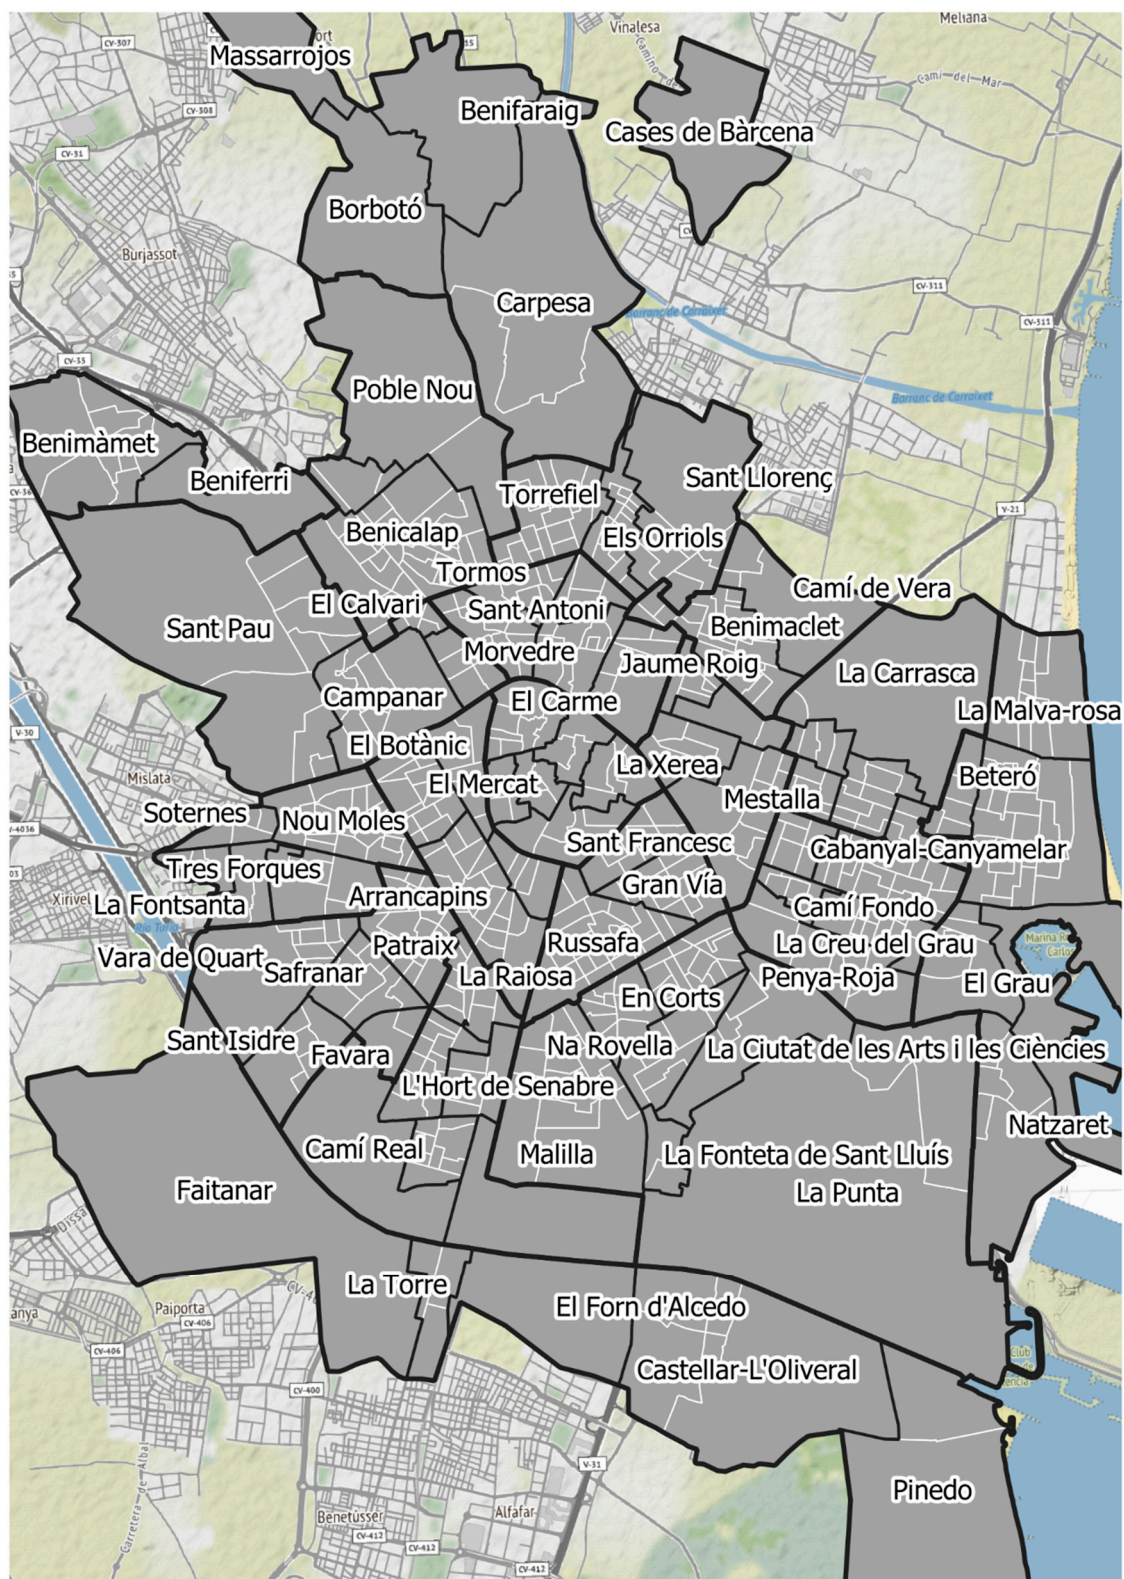

**Figure S1.** Territorial boundaries of Valencia: neighbourhood

Table S1. Hypothesis testing. Comparisons between clusters.

| Contrasts                                                                                                                             | Kruskal-Wallis |    | Z-test |    | ANOVA    |          | T-test |     |
|---------------------------------------------------------------------------------------------------------------------------------------|----------------|----|--------|----|----------|----------|--------|-----|
|                                                                                                                                       | $\chi^2$       | df | Z      | df | F        | df       | t      | df  |
| Hosting public housing (all clusters)                                                                                                 | 3.163          | 3  |        |    |          |          |        |     |
| Hosting public housing buildings (H Low-income vs. Low-income)                                                                        |                |    | 0.556  | 1  |          |          |        |     |
| Hosting public housing buildings (H Rent vs. L Rent)                                                                                  |                |    | 0.581  | 1  |          |          |        |     |
| n public housing buildings (all clusters)                                                                                             |                |    |        |    | 5.862*** | (3, 592) |        |     |
| n public housing buildings (H Low-income vs. L Low-income)                                                                            |                |    |        |    |          |          | 1.709* | 594 |
| n public housing buildings (H Rent vs. L Rent)                                                                                        |                |    |        |    |          |          | 1.697* | 594 |
| n dwellings (all clusters)                                                                                                            |                |    |        |    | 0.28     | (3, 592) |        |     |
| n dwellings (H Low-income vs. L Low-income)                                                                                           |                |    |        |    |          |          | 0.671  | 594 |
| n dwellings (H Rent vs. L Rent)                                                                                                       |                |    |        |    |          |          | 0.281  |     |
| Sh <sup>1</sup> public housing buildings (all clusters)                                                                               |                |    |        |    | 0.375    | (3, 592) |        |     |
| Sh public housing buildings (H Low-income vs. L Low-income)                                                                           |                |    |        |    |          |          | -0.475 |     |
| Sh public housing buildings (H Rent vs. L Rent)                                                                                       |                |    |        |    |          |          | 0.529  | 594 |
| Sh <sup>2</sup> dwellings (all clusters)                                                                                              |                |    |        |    | 0.202    | (3, 592) |        |     |
| Sh dwellings (H Low-income vs. L Low-income)                                                                                          |                |    |        |    |          |          | 0.436  | 594 |
| Sh dwellings (H Rent vs. L Rent)                                                                                                      |                |    |        |    |          |          | 0.122  | 594 |
| <sup>1</sup> Share of buildings totally or partially intended for public housing over total residential buildings                     |                |    |        |    |          |          |        |     |
| <sup>2</sup> Share of dwellings hosted in buildings totally or partially intended for public housing over total residential buildings |                |    |        |    |          |          |        |     |
| *** p < 0.01                                                                                                                          |                |    |        |    |          |          |        |     |
| * p < 0.1                                                                                                                             |                |    |        |    |          |          |        |     |
